# Supplementary material for: Construction of high-density genetic map and QTL mapping of yield-related and two quality traits in soybean RILs population by RAD-sequencing
Source: PubMed Central journal article supplement (PMC5477377; doi:10.1186/s12864-017-3854-8), 2017-06-19
Supplement: 12864_2017_3854_MOESM1_ESM.pdf [file 12864_2017_3854_MOESM1_ESM.pdf]

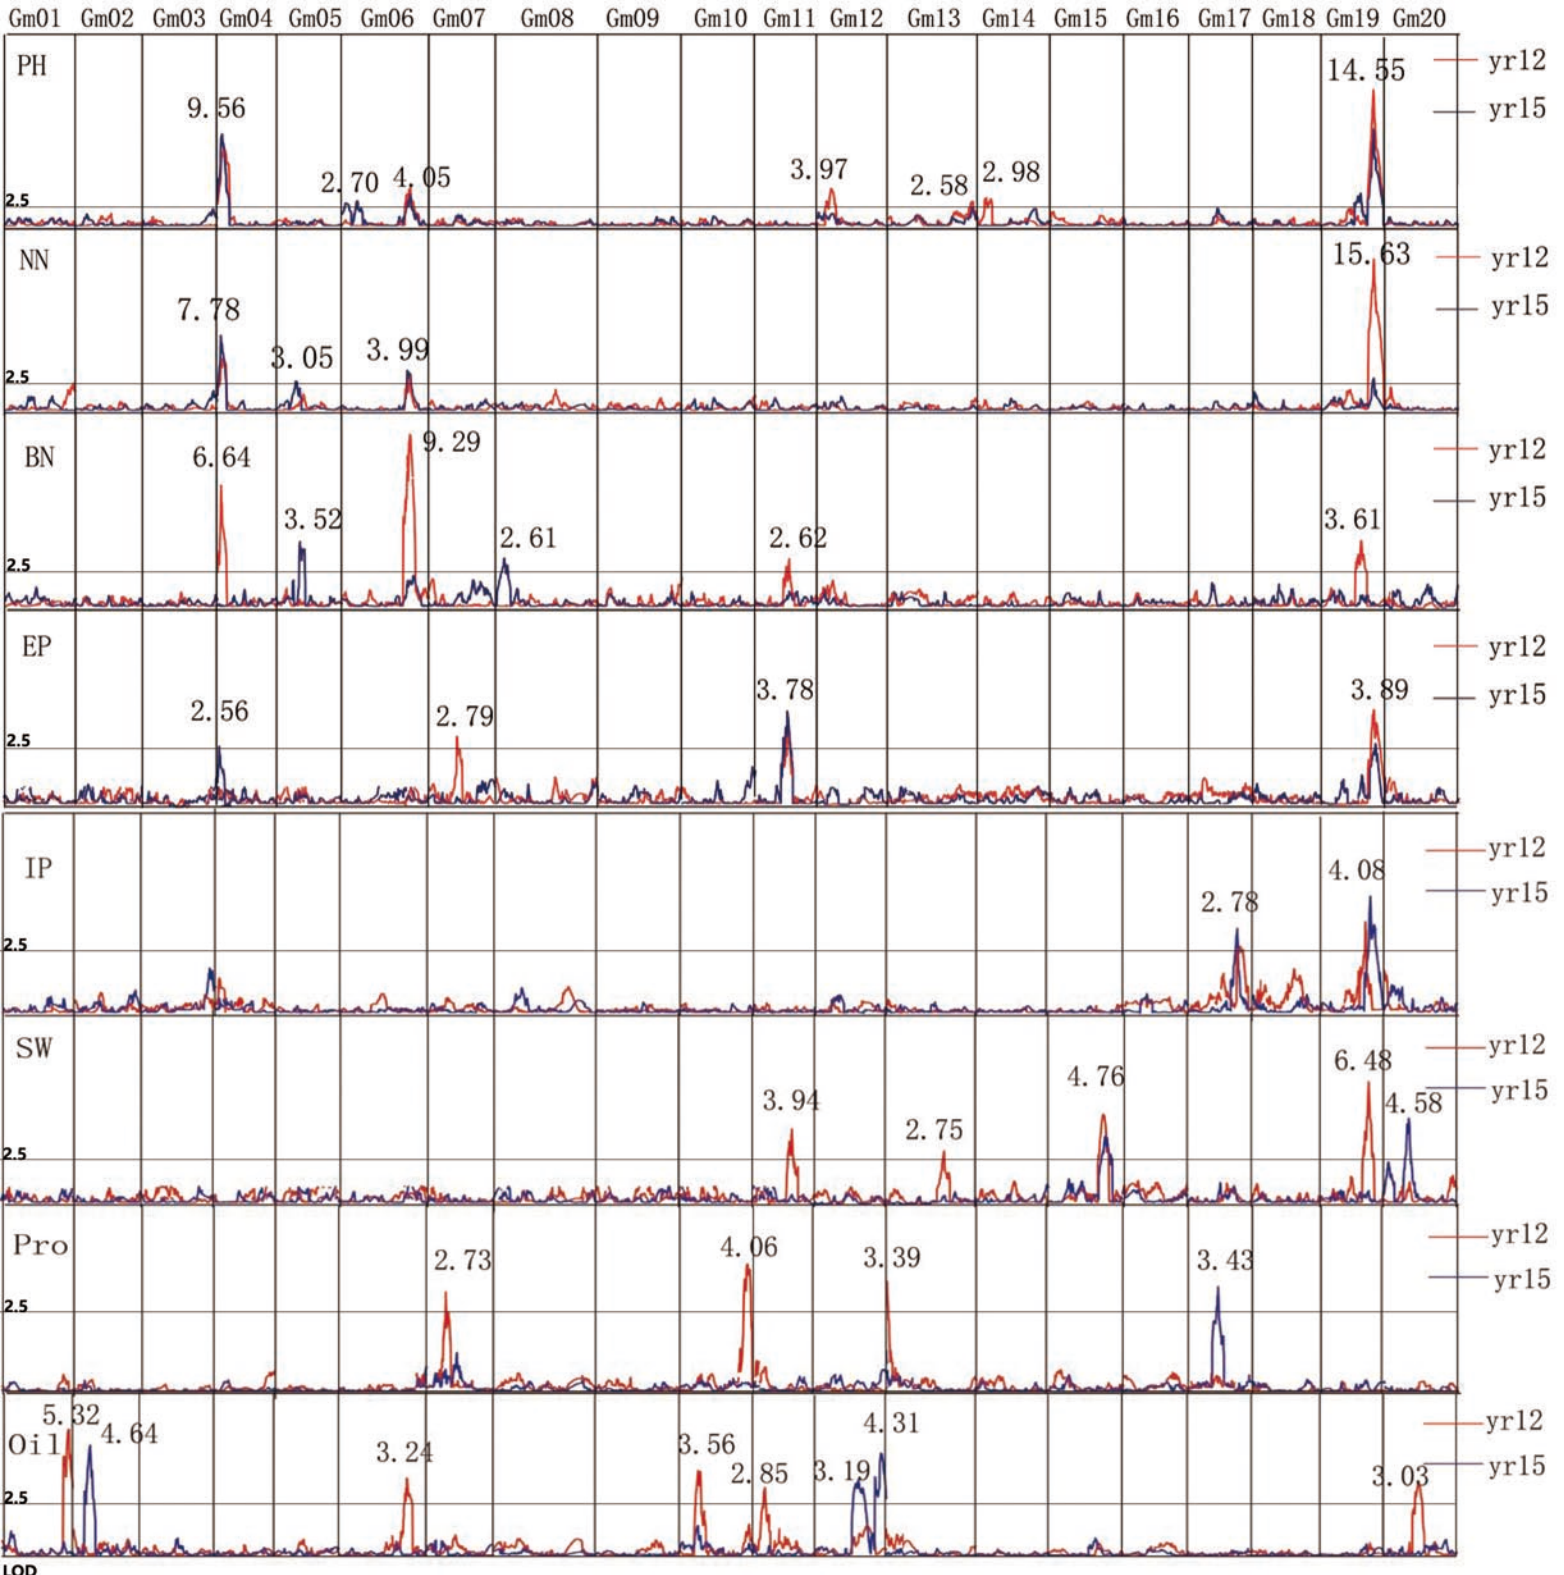

LOD
