# Supplementary material for: Construction of high-density genetic map and QTL mapping of yield-related and two quality traits in soybean RILs population by RAD-sequencing
Source: PubMed Central journal article supplement (PMC5477377; doi:10.1186/s12864-017-3854-8), 2017-06-19
Supplement: 12864_2017_3854_MOESM2_ESM.pdf [file 12864_2017_3854_MOESM2_ESM.pdf]

**Table S1. Difference in agronomic traits between the parents and their recombinant inbred lines**

| Traits                    | Parents      |          |           | RIL populations |                            |
|---------------------------|--------------|----------|-----------|-----------------|----------------------------|
|                           | Zhonghuang24 | Huaxia3  | Means     | Range           | coefficient of variation/% |
| PH/cm(2012 <sup>a</sup> ) | 64.8±4.5     | 86.0±4.3 | 80.7±17.5 | 37.7-132.1      | 21.7                       |
| PH/cm(2015 <sup>b</sup> ) | 46.6±2.5     | 62.2±3.1 | 70.2±16.5 | 30.8-107.4      | 23.5                       |
| NN(2012 <sup>a</sup> )    | 15±1.1       | 19±1.0   | 17±2.5    | 11-24           | 14.7                       |
| NN(2015 <sup>b</sup> )    | 11±1.4       | 19±0.8   | 17±2.9    | 10-24           | 17.1                       |
| BN (2012 <sup>a</sup> )   | 2±0.4        | 8±0.4    | 5±1.4     | 1-9             | 28.0                       |
| BN (2015 <sup>b</sup> )   | 2±0.7        | 5±0.5    | 5±1.5     | 1-11            | 30.0                       |
| EP(2012 <sup>a</sup> )    | 47±7.3       | 111±14.4 | 73±19.8   | 31-223          | 27.1                       |
| EP(2015 <sup>b</sup> )    | 28±2.9       | 72±7.3   | 68±19.5   | 31-137          | 28.7                       |
| IP(2012 <sup>a</sup> )    | 1±0.7        | 8±2.1    | 4±3.3     | 1-26            | 82.5                       |
| IP(2015 <sup>b</sup> )    | 2±0.7        | 4±1.3    | 4±3.5     | 0-21            | 87.5                       |
| SW/g(2012 <sup>a</sup> )  | 15.0±0.2     | 16.9±0.2 | 16.3±1.9  | 12.1-21.5       | 11.7                       |
| SW/g(2015 <sup>b</sup> )  | 15.8±0.1     | 18.8±0.2 | 14.4±2.0  | 10.41-20.47     | 13.9                       |
| Pro (2012 <sup>a</sup> )  | 40.9±0.1     | 45.1±0.1 | 40.9±1.5  | 35.7-46.7       | 3.7                        |
| Pro (2015 <sup>b</sup> )  | 39.7±0.1     | 42.4±0.1 | 41.4±1.1  | 38.7-44.1       | 2.7                        |
| Oil (2012 <sup>a</sup> )  | 23.1±0.1     | 21.7±0.1 | 22.7±1.1  | 18.2-25.6       | 4.8                        |
| Oil(2015 <sup>b</sup> )   | 23.1±0.0     | 21.9±0.1 | 22.2±0.4  | 20.6-23.8       | 1.8                        |

PH: plant height; NN: number of nodes; BN: number of branches; EP: number of effective pods; IP: number of invalid pods; SW: 100-seed weight; Pro: seed protein content; Oil: seed oil content

<sup>a</sup> The data used was generated in summer 2012

<sup>b</sup> The data used was generated in summer 2015
