# Supplementary material for: Construction of high-density genetic map and QTL mapping of yield-related and two quality traits in soybean RILs population by RAD-sequencing
Source: PubMed Central journal article supplement (PMC5477377; doi:10.1186/s12864-017-3854-8), 2017-06-19
Supplement: 12864_2017_3854_MOESM3_ESM.pdf [file 12864_2017_3854_MOESM3_ESM.pdf]

**Table S2. QTLs detected in RILs population that reported by previously studies**

| QTL Name   | Chr <sup>a</sup> : Physical position | LOD <sup>b</sup> | Additive effect | R <sup>2</sup> (%) <sup>c</sup> | Related QTLs <sup>d</sup>     |
|------------|--------------------------------------|------------------|-----------------|---------------------------------|-------------------------------|
| qPH06a-1   | Chr06:18376759-18680015              | 3.34             | 4.64            | 5.57                            | Plant height 18-4[34]         |
| qPH06a-2   | Chr06:38809121-41420709              | 4.05             | 4.82            | 6.69                            | Plant height 20-4[35]         |
| qPH13a     | Chr13:42318489-42430858              | 2.58             | -3.50           | 3.78                            | Plant height 23-5[44]         |
| qPH14a-1   | Chr14:2331748-2575520                | 2.98             | 4.10            | 4.98                            | Plant height 34-6[18]         |
| qPH19a**   | Chr19:44931101-45081885              | 14.55            | -9.60           | 28.01                           | Plant height 4-2 [32]         |
| qNN06a-1** | Chr06:18680016-18977543              | 2.68             | 0.62            | 5.18                            | Node number 2-2[64]           |
| qNN06a-2   | Chr06:38299978-38809120              | 3.48             | 0.68            | 6.65                            | Node number 1-4[35]           |
| qBN06a     | Chr06:38299978-38809120              | 9.29             | 0.64            | 19.77                           | Branching 1-4[42]             |
| qBN19a     | Chr19:40662371-40701058              | 3.61             | 0.38            | 7.18                            | Branching 3-2 [60]            |
| qEP19a**   | Chr19:44764317-44931100              | 3.89             | 6.29            | 9.06                            | Pod number 1-9[39]            |
| qIP19a     | Chr19:42309067-42469449              | 3.68             | 1.49            | 9.19                            | Pod number 1-9[39]            |
| qSW19a-1   | Chr19:43923975-44261964              | 6.48             | -0.73           | 14.64                           | Seed weight 7-7/17-1[40, 57]  |
| qSW15a**   | Chr15:14767270-16683419              | 4.76             | 0.62            | 10.75                           | Seed weight 6-1[40]           |
| qSW11a     | Chr11:18125735-18594023              | 3.94             | -0.55           | 8.52                            | Seed weight 32-1[61]          |
| qSW13a     | Chr13:34923404-35011420              | 2.75             | -0.45           | 5.74                            | Seed weight 45-6[62]          |
| qSW19a-2   | Chr19:42309067-42469449              | 3.82             | -0.57           | 8.99                            | Seed weight 15-7/35-7[45, 56] |
| qPH06b-2   | Chr06:28751251-33715231              | 3.43             | 4.73            | 7.23                            | Plant height18-4[34]          |
| qPH19b-1   | Chr19:40662371-40701058              | 3.55             | 4.96            | 7.31                            | Plant height 1-1[59]          |
| qPH19b-2** | Chr19:44931101-45081885              | 10.34            | -9.11           | 24.49                           | Plant height 4-2 [32]         |
| qNN06b**   | Chr06:18977544-19504937              | 3.99             | 0.92            | 9.10                            | Node number 2-2[64]           |
| qEP19b     | Chr19:40662371-40701058              | 3.57             | 5.90            | 8.74                            | Pod number 1-9[39]            |
| qIP19b**   | Chr19:44261965-44544573              | 4.08             | 1.15            | 10.36                           | Pod number 1-9[39]            |
| qSW15b**   | Chr15:16683420-17383420              | 3.44             | 0.68            | 11.07                           | Seed weight 6-1[40]           |
| qSW20b-2   | Chr20:33207531-33259106              | 4.58             | -0.77           | 12.80                           | Seed weight 9-1[63]           |
| qPro07a    | Chr07:8197411-8246204                | 2.73             | 0.39            | 6.83                            | Seed protein 24-4[45]         |
| qoi101a    | Chr01:53643709-53766235              | 5.32             | -0.37           | 13.30                           | Seed oil 37-2[27]             |
| qoi106a    | Chr06:37764770-38299977              | 3.24             | 0.28            | 7.74                            | Seed oil 33-1[41]             |
| qoi110a    | Chr10:5306155-5360052                | 3.56             | -0.30           | 8.54                            | Seed oil 34-6[46]             |

|           |                         |      |       |       |                            |
|-----------|-------------------------|------|-------|-------|----------------------------|
| q0i111a   | Chr11:5083072-5441113   | 2.85 | -0.27 | 6.76  | Seed oil 4-5[47]           |
| q0i120a   | Chr20:34770628-34809740 | 3.03 | 0.27  | 7.18  | Seed oil 24-6/27-4[43, 44] |
| q0i102b-1 | Chr02:4838719-5017571   | 2.70 | 0.12  | 7.52  | Seed oil 20-2[50]          |
| q0i102b-2 | Chr02:6519813-6826911   | 4.64 | 0.16  | 12.49 | Seed oil 20-2[50]          |
| q0i112b-1 | Chr12:33860238-34136030 | 3.19 | 0.13  | 8.50  | Seed oil 6-5[48]           |
| q0i112b-2 | Chr12:38572504-39497790 | 4.31 | -0.16 | 12.06 | Seed oil 7-1[49]           |

---

\*\*marked by QTL name indicates a new, stable QTL that was detected in both years

<sup>a</sup>Chr indicates chromosome.

<sup>b</sup>LOD indicates the logarithm of odds score.

<sup>c</sup>Percentage of phenotypic variation explained.

<sup>d</sup>Related QTLs have been reported in the previous studies of the region which was identified in the Zhonghuang 24 and Huaxi 3 RILs population
