# Supplementary material for: Construction of high-density genetic map and QTL mapping of yield-related and two quality traits in soybean RILs population by RAD-sequencing
Source: PubMed Central journal article supplement (PMC5477377; doi:10.1186/s12864-017-3854-8), 2017-06-19
Supplement: 12864_2017_3854_MOESM4_ESM.pdf [file 12864_2017_3854_MOESM4_ESM.pdf]

**Table S3. 8 QTL hotspots detected in Zhonghuang24 × Huaxia3 RIL population in two years**

| Chr <sup>a</sup> _Bin range | Physical position | QTL Name               | LOD <sup>b</sup> | Additive effect | R <sup>2</sup> (%) <sup>c</sup> | Related QTLs <sup>d</sup>                                         |
|-----------------------------|-------------------|------------------------|------------------|-----------------|---------------------------------|-------------------------------------------------------------------|
| Chr04_bin19-bin20           | 3657048-3781822   | qNN04a-1 <sup>**</sup> | 5.29             | 0.83            | 9.10                            |                                                                   |
|                             |                   | qBN04a                 | 6.64             | 0.55            | 13.44                           | Novel region                                                      |
|                             |                   | qNN04b <sup>**</sup>   | 7.78             | 1.33            | 17.68                           |                                                                   |
|                             |                   | qEP04b                 | 2.56             | 5.18            | 6.17                            |                                                                   |
| Chr04_bin22-bin23           | 3815206-5131478   | qPH04a <sup>**</sup>   | 8.21             | 7.73            | 15.71                           | Seed weight 6-7[40];Seed protein 12-2[33].                        |
|                             |                   | qNN04a-2               | 5.09             | 0.86            | 9.59                            |                                                                   |
|                             |                   | qPH04b <sup>**</sup>   | 9.56             | 8.78            | 21.53                           |                                                                   |
| Chr06_bin99-bin101          | 18376759-19504937 | qPH06a-1               | 3.33             | 4.64            | 5.57                            | Plant height 18-4[34]; Node number 2-2[64];                       |
|                             |                   | qNN06a-1 <sup>**</sup> | 2.68             | 0.62            | 5.18                            | Pod number 3-3[51];Seed weight 15-1/16-1[45, 52];                 |
|                             |                   | qNN06b <sup>**</sup>   | 3.99             | 0.92            | 9.10                            | Seed oil 23-1[45];Seed oil plus protein 1-3[42].                  |
| Chr06_bin110-bin112         | 37764770-41420709 | qPH06a-2               | 4.05             | 4.82            | 6.69                            | Plant height 20-4[35];Node number 1-4[35];                        |
|                             |                   | qNN06a-2               | 3.48             | 0.68            | 6.65                            | Branching 1-4[42]; Seed oil 33-1/31-2 [45, 53];                   |
|                             |                   | qBN06a                 | 9.29             | 0.64            | 19.77                           | Seed oil plus protein 1-2[42];Pod number 2-1[42];                 |
|                             |                   | qOil06a                | 3.24             | 0.28            | 7.74                            | Seed weight 31-1/40-3[41, 17];<br>Seed protein 28-1/35-2[54, 17]. |
| Chr11_bin72-bin77           | 14584137-16449587 | qBN11a                 | 2.62             | 0.32            | 4.97                            | Seed weight 4-1/11-1[37, 38];                                     |
|                             |                   | qEP11a <sup>**</sup>   | 3.07             | 5.52            | 6.96                            | Seed protein 25-1/25-2[35].                                       |
|                             |                   | qEP11b <sup>**</sup>   | 3.78             | 6.05            | 9.31                            |                                                                   |
| Chr19_bin97-bin103          | 43923975-45138371 | qPH19a <sup>**</sup>   | 14.55            | -9.60           | 28.01                           | Plant height 4-2/13-8 [32, 33];Pod number 1-9[39];                |
|                             |                   | qNN19a <sup>**</sup>   | 15.63            | -1.48           | 32.56                           | Seed weight 7-7/17-1[40, 57];                                     |
|                             |                   | qEP19a <sup>**</sup>   | 3.89             | 6.29            | 9.06                            | Seed oil 3-1/23-4[55, 45];                                        |
|                             |                   | qSW19a-1               | 6.48             | -0.73           | 14.64                           | Seed protein 2-2[55].                                             |
|                             |                   | qPH19b-2 <sup>**</sup> | 10.34            | -9.11           | 24.49                           |                                                                   |
|                             |                   | qNN19b <sup>**</sup>   | 3.15             | -0.76           | 6.60                            |                                                                   |
| Chr19_bin77                 | 40662371-40701058 | qBN19a                 | 3.61             | 0.38            | 7.18                            | Plant height 1-1[59]; Pod num 1-9[39];                            |

|             |                   |          |      |       |      |                                                  |
|-------------|-------------------|----------|------|-------|------|--------------------------------------------------|
|             |                   | qPH19b-1 | 3.55 | 4.96  | 7.31 | Seed weight 35-7[56]; Seed protein 30-7[46];     |
|             |                   | qEP19b   | 3.57 | 5.90  | 8.74 | Seed oil 24-7[43].                               |
| Chr19_bin91 | 42309067-42469449 | qIP19a   | 3.68 | 1.49  | 9.19 | Pod num 1-9[39];Seed protein 8-1[40];            |
|             |                   | qSW19a-2 | 3.82 | -0.57 | 8.99 | Seed oil 24-7[43];                               |
|             |                   |          |      |       |      | Seed weight 5-1/15-7/17-1/35-7 [40, 45, 57, 56]. |

---

\*\*marked by QTL name indicates a stable QTL that was detected in two years.

<sup>a</sup>Chr indicates chromosome.

<sup>b</sup>LOD indicates the logarithm of odds score.

<sup>c</sup>Percentage of phenotypic variation explained.

<sup>d</sup>Related QTLs have been reported in previous studies of the region which was identified in the Zhonghuang 24 and Huaxi 3 RILs population
