# Supplementary material for: Construction of high-density genetic map and QTL mapping of yield-related and two quality traits in soybean RILs population by RAD-sequencing
Source: PubMed Central journal article supplement (PMC5477377; doi:10.1186/s12864-017-3854-8), 2017-06-19
Supplement: 12864_2017_3854_MOESM5_ESM.pdf [file 12864_2017_3854_MOESM5_ESM.pdf]

**Table S4. Annotation description of five gene groups based on GO analysis**

| Groups | Biological Process          | Glyma 1.1 ID                                                                                                                                       | Annotation Description                                                                                                                                                                                       |
|--------|-----------------------------|----------------------------------------------------------------------------------------------------------------------------------------------------|--------------------------------------------------------------------------------------------------------------------------------------------------------------------------------------------------------------|
| I      | phytohormones<br>regulation | Glyma19g36660, 36761, 36771, 36781, 36820, 36990,<br>37000, 37520, 37540, 37570, 37910, 38060, 38140.                                              | response to auxin stimulus/abscisic acid/ethylene;<br>indoleacetic acid biosynthetic.                                                                                                                        |
| II     | metabolic process           | Glyma19g36840, 36850, 36860, 36910, 36970, 36990,<br>37000, 37310, 37410, 37450, 37750, 37810, 37820,<br>37830, 37870, 37930, 37940, 37031, 37116. | polyamine/nuclear-transcribed mRNA/glycine/protein/fatty<br>acid/methylglyoxal catabolic process; glycerol ether/<br>one-carbon/hydrogen peroxide/carbohydrate/lipid/<br>brassinosteroid metabolic process.  |
| III    | protein phosphorylation     | Glyma19g36900, 37290, 37430, 37570, 37770, 37940.                                                                                                  | protein polymerization.                                                                                                                                                                                      |
| IV     | cellular process            | Glyma19g36710, 36720, 36820, 36990, 37060, 37250,<br>37480, 37540, 37570, 37600, 37610, 37680, 37770,<br>37890, 38150, 36791.                      | cell differentiation; cell proliferation; cell size;<br>multicellular organism reproduction; cell growth; meiosis;<br>cell division; cell cycle process.                                                     |
| V      | organ morphogenesis         | Glyma19g36700, 36710, 36820, 36990, 37380, 37530,<br>37570, 37660, 37740, 38150, 37910, 37750, 37870,<br>37890, 37010, 37410.                      | Regulation of plant-type hypersensitive response;<br>seedling development; root/stamen/embryo development;<br>leaf/flower morphogenesis; plant-type cell wall organization;<br>regulation of meristem growth |
